# Supplementary material
Source: PubMed Central journal article supplement (PMC3689964)
Supplement: supp_M113.475376_jbc.M113.475376-1.pdf [file supp_M113.475376_jbc.M113.475376-1.pdf]

## Supplementary Information

**Supplementary Figure 1. Kras G12D mice in the BALB/c background show similar phenotypes as those in the B6 background.** Five-seven week old control and Kras G12D mice in the B6 or BALB/c background were injected with pI-pC as described in Materials and Methods. (A) Kaplan-Meier survival curves were plotted against days after the 1<sup>st</sup> pI-pC injection. Log-rank test was performed to determine statistical significance. (B) Quantitative analysis of HSCs in hind limb bone marrow [BM (H.L.)] and spleen (SP) of control and Kras G12D mice in different backgrounds. HSCs are defined as [CD41 CD48 B220 Gr1 TER119]<sup>-</sup> CD150<sup>+</sup> cKit<sup>+</sup> cells. Data are presented as mean + s.d.. (C,D) Total bone marrow cells were serum- and cytokine- starved for 1 or 2 hours and stimulated with various concentrations of SCF (C) or GM-CSF (D) at 37°C for 10 minutes. Levels of phosphorylated AKT, ERK1/2, and STAT5 were measured using phospho-specific flow cytometry. Non-neutrophil bone marrow cells were gated for data analysis. Myeloid progenitors are enriched in c-Kit<sup>+</sup> Lin<sup>-/low</sup> cells, whereas myeloid precursors are enriched in c-Kit<sup>-</sup> Lin<sup>-/low</sup> cells. To quantify the activation of AKT, ERK1/2, or STAT5, median intensities of p-AKT, p-ERK, or p-STAT5 at different cytokine concentrations in different groups of animals are compared to those of their respective control cells at 0 ng/ml, which are arbitrarily set at 1. n.s., not significant.

**Supplementary Figure 2. Notch1 Type 1 deletions are identified in 100% of Nras G12D/+ or G12D/G12D-induced TALL.**

**Supplementary Figure 3. Notch1 Type 1 deletions are not detectable in primary Kras G12D bone marrow cells.**

**Supplementary Figure 4. The presence of Notch1 Type 1 deletions correlates with T-LIC activity.** T-ALL cells were isolated from moribund recipient mice and fractionated into different populations. Sorted cells were further transplanted into 2<sup>nd</sup> recipients to test for T-LIC activity (A) and presence of Notch1 Type 1 deletion (B).

**Supplementary Figure 5. Transplantation of fractionated and serially diluted T-ALL cells.** T-ALL was scored for up to 16-20 weeks posttransplant.

Fig S1-Zhang

**A**

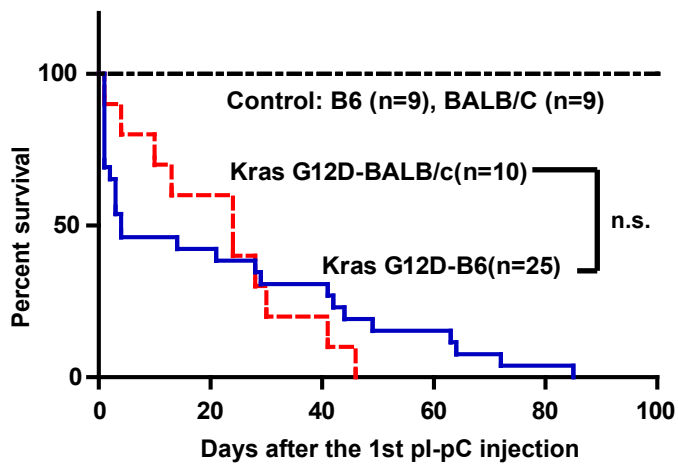

**B**

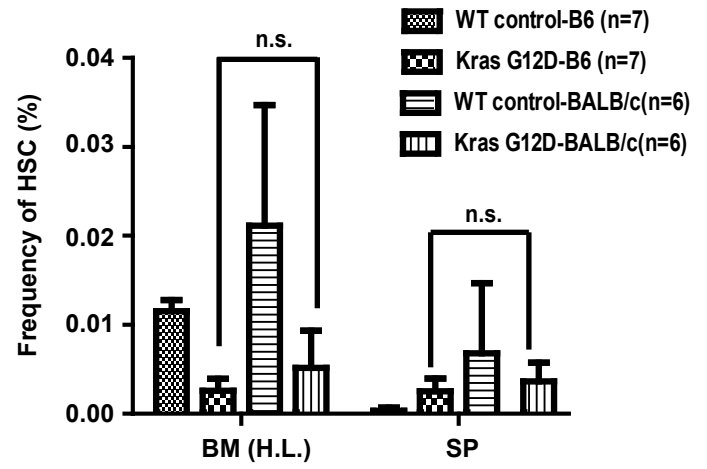

**C**

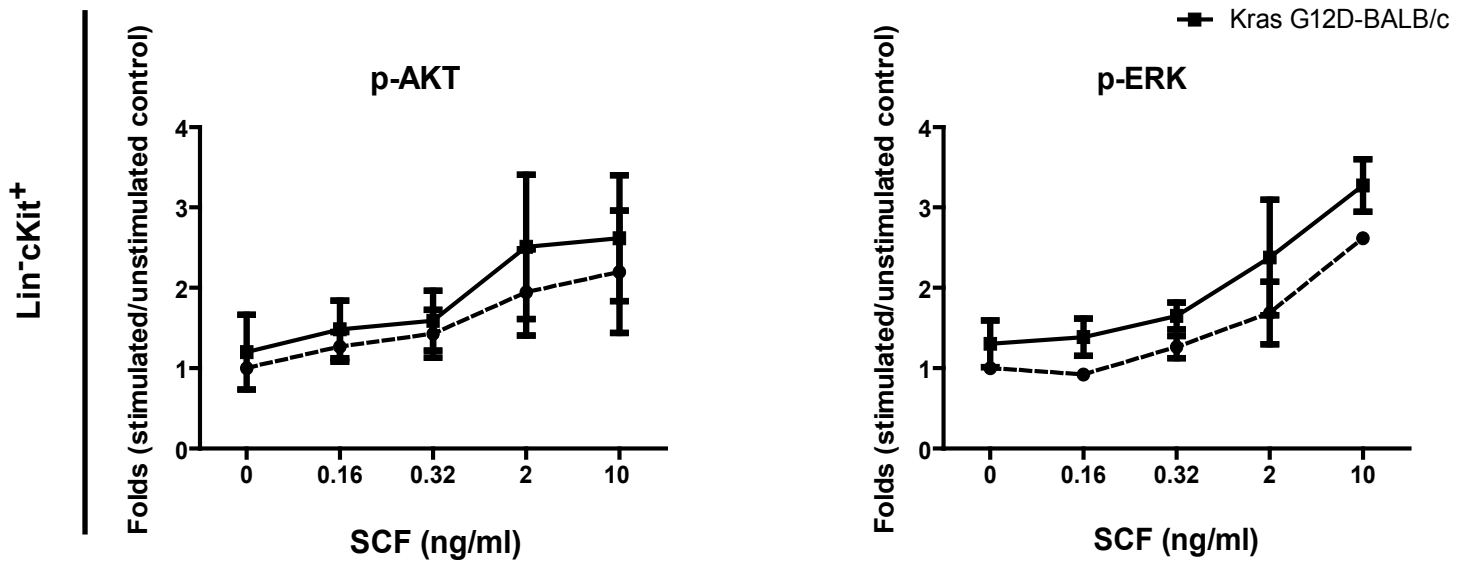

**D**

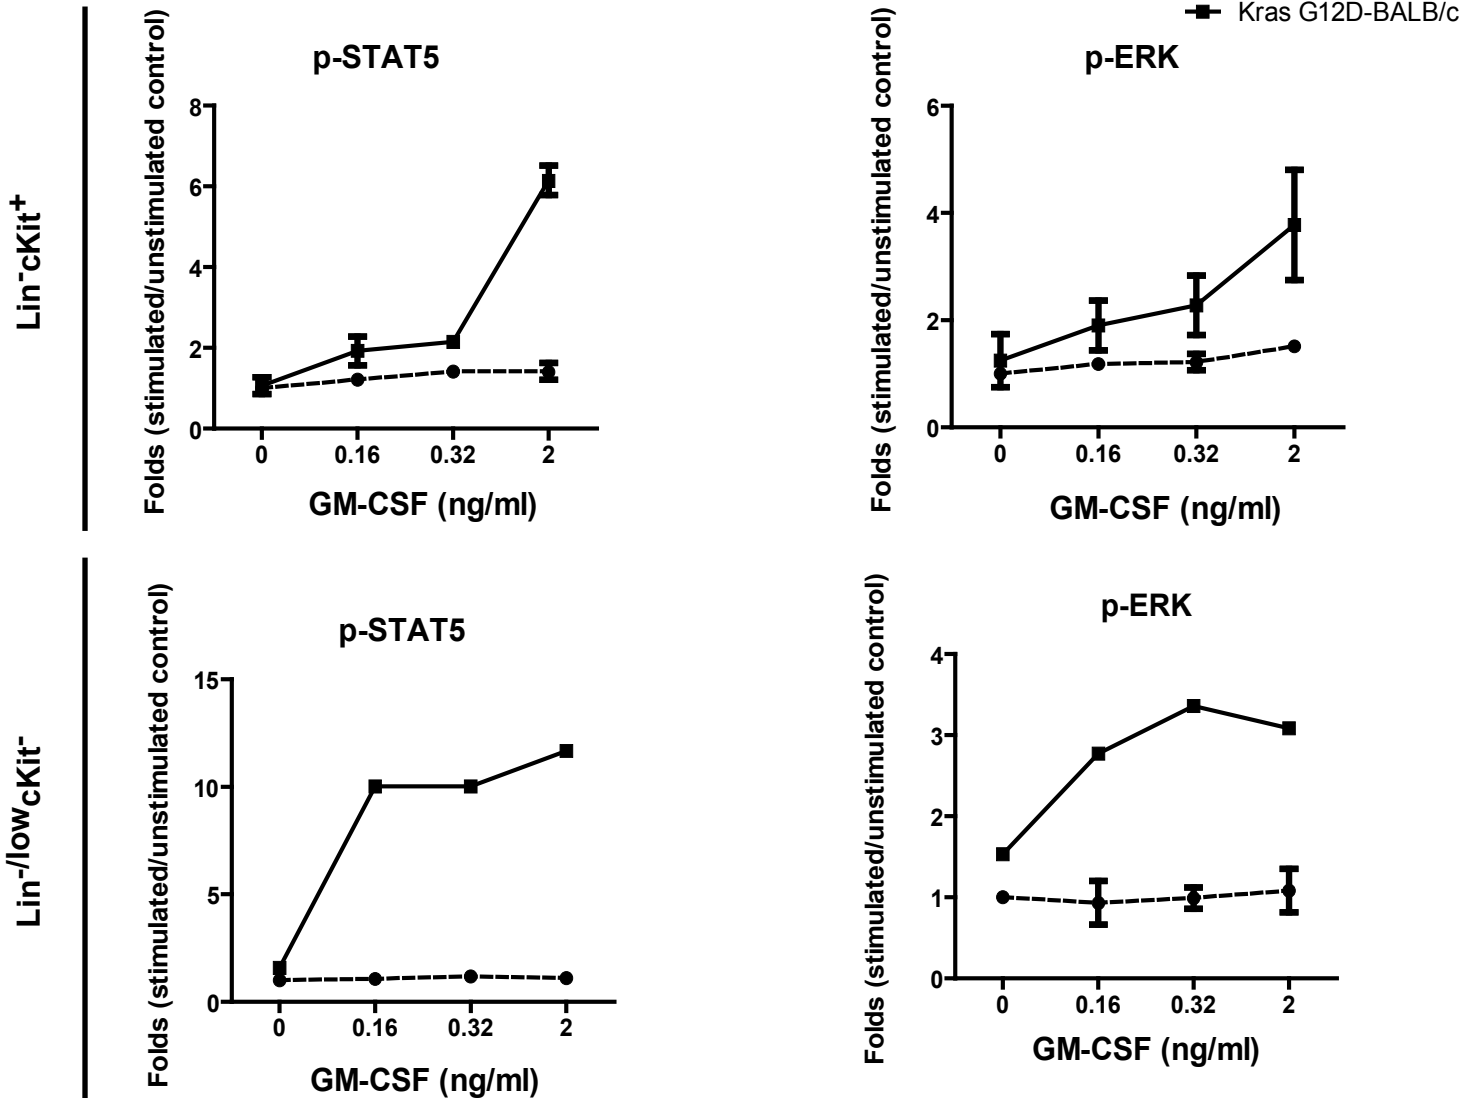

**Fig S2-Zhang**

**Nras G12D/G12D T-ALL**

**Control**

**G12D/+ T-ALL**

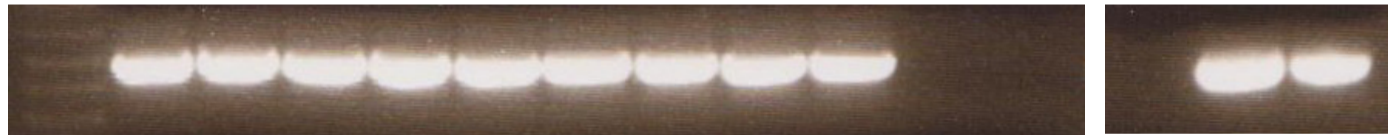

# Fig S3-Zhang

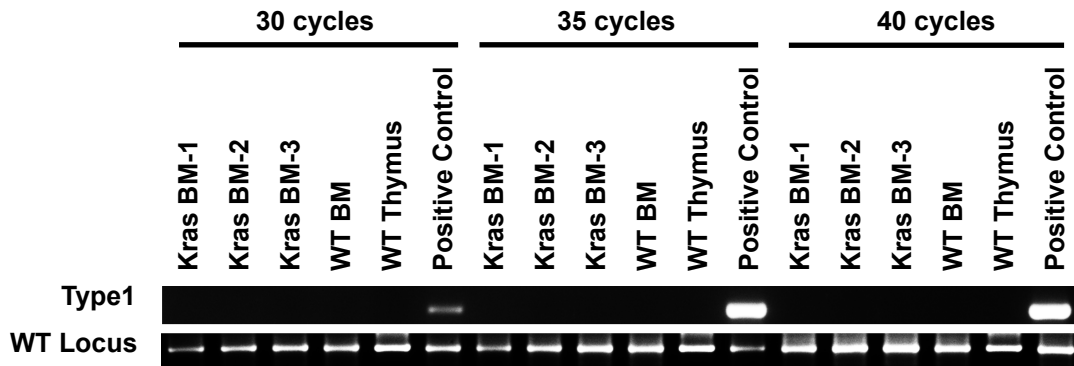

# Fig S4-Zhang

## A

| Cell Type | Injection dose | # of T-ALL mice/# of transplanted mice |
|-----------|----------------|----------------------------------------|
| CD8+      | $10^6$         | 2/2                                    |
|           | $10^5$         | 2/2                                    |
|           | $10^4$         | 3/3                                    |
| CD8-      | $10^5$         | 0/4                                    |
|           | $10^4$         | 0/6                                    |
|           | $10^3$         | 1/10                                   |
|           | $10^2$         | 0/6                                    |
|           | 10             | 0/6                                    |

## B

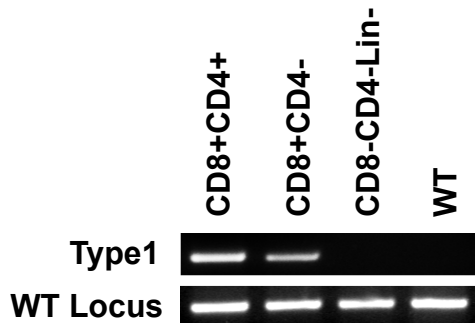

**Fig S5-Zhang**

**Group I**

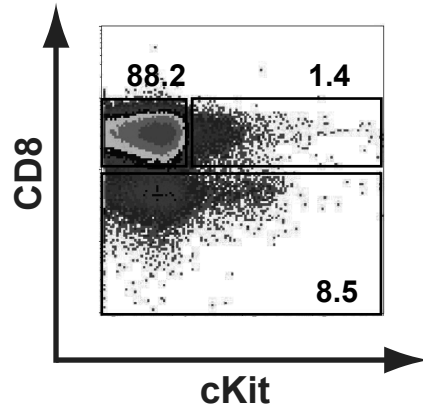

| Cell Type  | Injection dose  | # of T-ALL mice/# of transplanted mice |
|------------|-----------------|----------------------------------------|
| CD8+ cKit- | 10 <sup>6</sup> | 0/6                                    |
|            | 10 <sup>5</sup> | 0/4                                    |
| CD8+cKit+  | 10 <sup>5</sup> | 2/2                                    |
|            | 10 <sup>4</sup> | 2/2                                    |
|            | 10 <sup>3</sup> | 1/2                                    |
|            | 10 <sup>2</sup> | 0/2                                    |

**Group II**

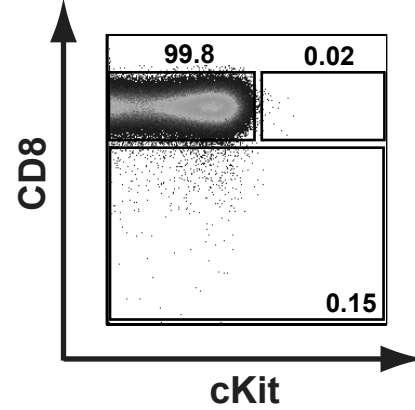

| Cell Type  | Injection dose  | # of T-ALL mice/# of transplanted mice |
|------------|-----------------|----------------------------------------|
| CD8+ cKit- | 10 <sup>6</sup> | 1/1                                    |
|            | 10 <sup>5</sup> | 2/2                                    |
|            | 10 <sup>4</sup> | 3/3                                    |
|            | 10 <sup>3</sup> | 2/2                                    |
| CD8+cKit+  | 10 <sup>3</sup> | 2/6                                    |
|            | 10 <sup>2</sup> | 0/8                                    |
